# Supplementary material for: An evolutionarily young defense metabolite influences the root growth of plants via the ancient TOR signaling pathway
Source: eLife journal article supplement (doi:10.7554/elife.29353), 2017-12-11
Supplement: supp [file elife-29353-supp-v1.zip]

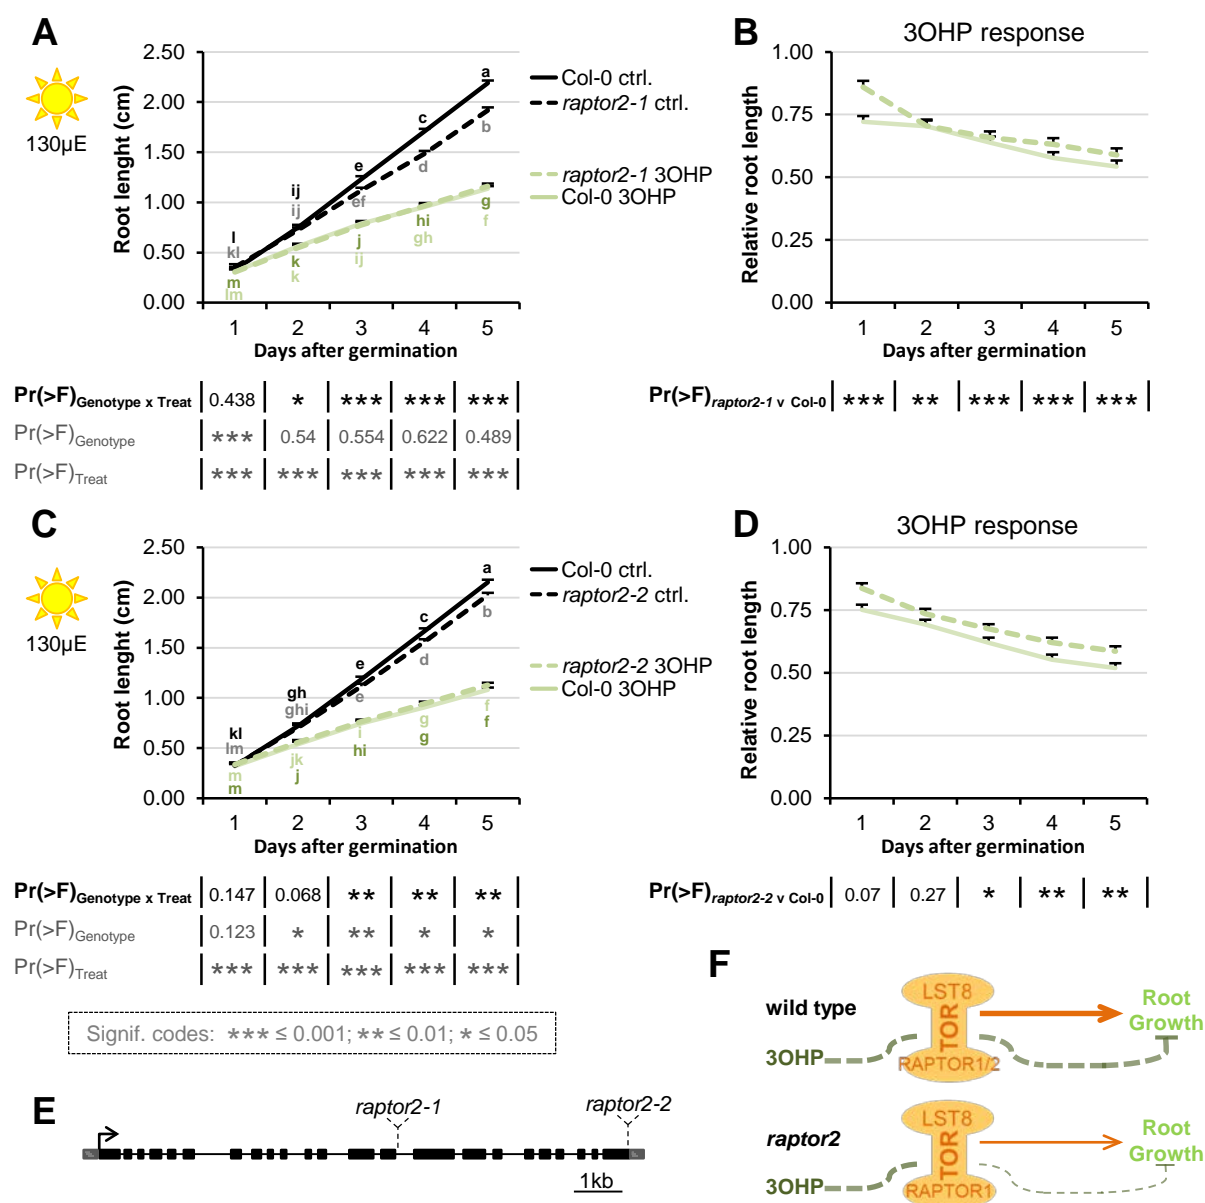

**Figure 5 –figure supplement 3. Loss of one of the two substrate-binding TORC-subunits affect 3OHP response.**

**A** Root growth for *raptor2-1* and wildtype Col-0 seedlings grown on MS medium supplemented with or without 5 $\mu$ M 3OHP. Multi-factorial ANOVA was used to test the impact of Genotype (Col-0 v *raptor2-1*), Treatment (Control v 3OHP) and their interaction on root length. All experiments were combined in the model and experiment treated as a random effect. The ANOVA results from each day are presented in the table. **B** Root lengths in response to 3OHP (from A) displayed at each time point as relative to untreated. Results are least squared means  $\pm$  SE over four independent experimental replicates with each experiment having an average of thirteen replicates per condition (n=36-68). **C** Root growth for *raptor2-2* and wildtype Col-0 seedlings grown on MS medium supplemented with or without 5 $\mu$ M 3OHP. Multi-factorial ANOVA was used to test the impact of Genotype (Col-0 v *raptor2-1*), Treatment (Control v 3OHP) and their interaction on root length. All experiments were combined in the model and experiment treated as a random effect. The ANOVA results from each day are presented in the table. **D** Root lengths in response to 3OHP (from C) displayed at each time point as relative to untreated. Results are least squared means  $\pm$  SE over three independent experimental replicates with each experiment having an average of nineteen replicates per condition (n=44-70). **E** Gene structure and T-DNA insertion sites for *RAPTOR2*. **F** Schematic model; loss of one of the substrate-binding subunits RAPTOR2 decreases growth, and the relative 3OHP response.
