# Supplementary material for: An evolutionarily young defense metabolite influences the root growth of plants via the ancient TOR signaling pathway
Source: eLife journal article supplement (doi:10.7554/elife.29353), 2017-12-11
Supplement: supp [file elife-29353-supp-v1.zip]

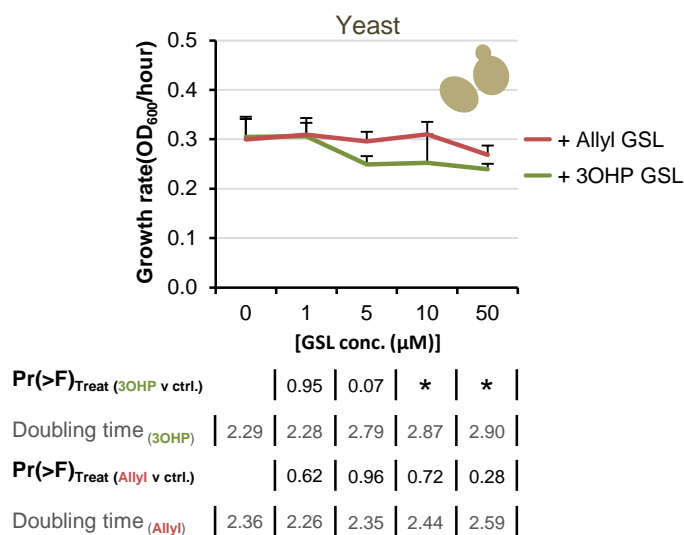

**Figure 3 –figure supplement 1. Yeast response to 3OHP suggests a conserved target throughout eukaryotes.**

Yeast growth in YPD media supplemented with none or increasing levels of 3OHP or Allyl. The hourly OD<sub>600</sub> increase is plotted against each concentration of either Allyl or 3OHP. The least squared means  $\pm$  SE over four replicates are presented (n=4). ANOVA was utilized to test for a significant effect of GLS treatment individually for each concentration of 3OHP and Allyl.
