# Supplementary material for: An evolutionarily young defense metabolite influences the root growth of plants via the ancient TOR signaling pathway
Source: eLife journal article supplement (doi:10.7554/elife.29353), 2017-12-11
Supplement: supp [file elife-29353-supp-v1.zip]

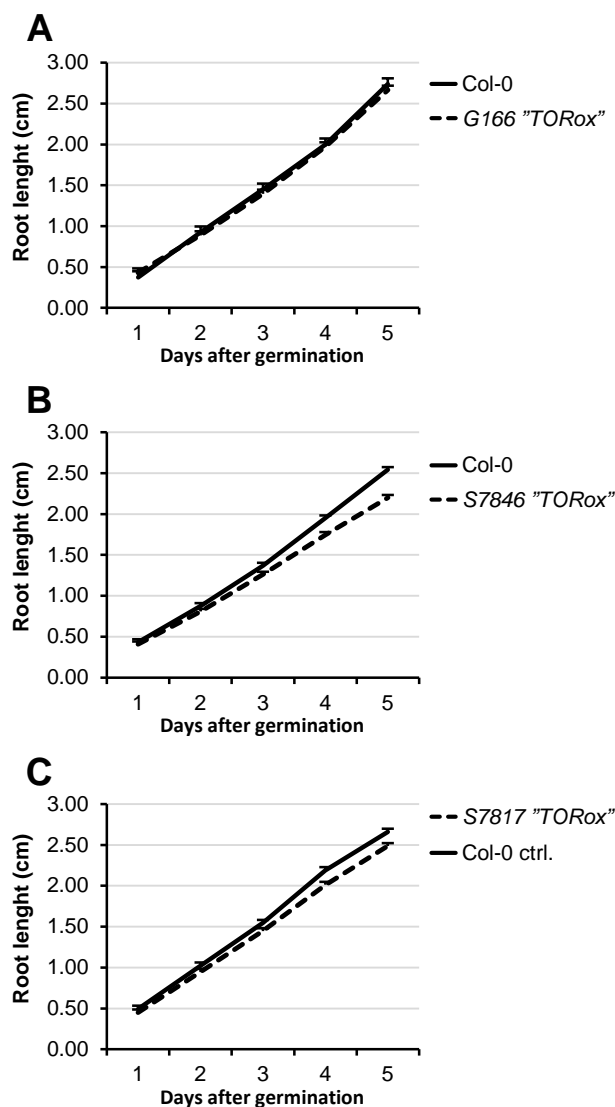

**Figure 5 –figure supplement 1. Published TORox lines that did not display the TORox phenotype under our conditions.**

Multi-factorial ANOVA was used to test the impact of Genotype (Col-0 v specific TORox lines) on root length. All experiments were combined in the model and experiment treated as a random effect. There were no significant differences found. **A** Root growth for the published TORox line G166 and wildtype Col-0 seedlings grown on MS medium supplemented with or without 5 $\mu$ M 3OHP. Results are least squared means  $\pm$  SE (n=8-16). **B** Root growth for the published TORox line S7846 and wildtype Col-0 seedlings grown on MS medium supplemented with or without 5 $\mu$ M 3OHP. Results are least squared means  $\pm$  SE ns across three biological repeats (n=35-45). **C** Root growth for the published TORox line S7817 and wildtype Col-0 seedlings grown on MS medium supplemented with or without 5 $\mu$ M 3OHP. Results are least squared means  $\pm$  SE (n=10-24).
