# Supplementary material for: An evolutionarily young defense metabolite influences the root growth of plants via the ancient TOR signaling pathway
Source: eLife journal article supplement (doi:10.7554/elife.29353), 2017-12-11
Supplement: supp [file elife-29353-supp-v1.zip]

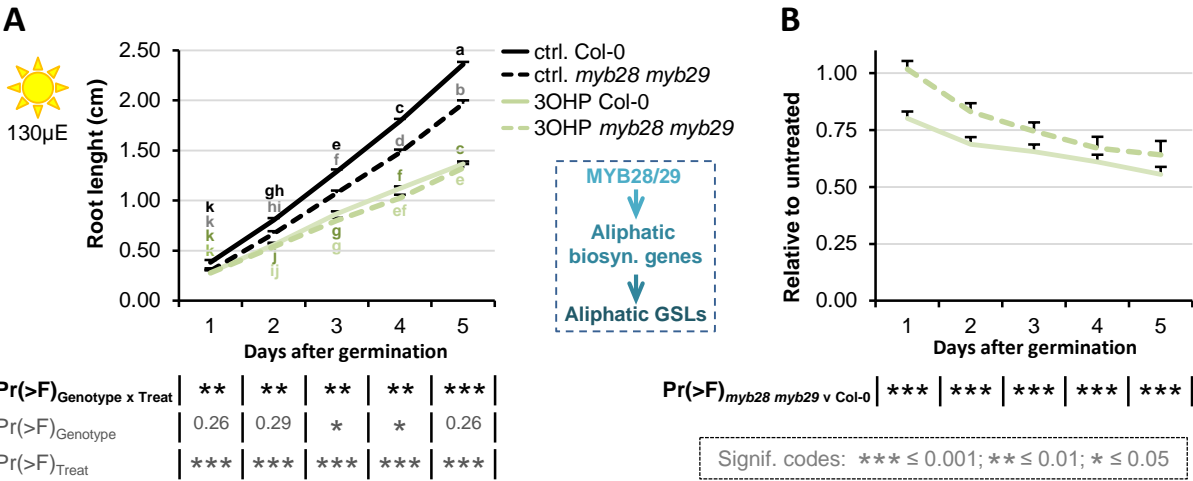

**Figure 1. figure supplement 1. Root inhibition is affected by endogenous 3OHP/GSLs levels.**

**A.** Root growth rates for seedlings grown on MS medium supplemented with or without 5µM 3OHP. **B.** The root lengths (from A) displayed at each time point as relative to untreated. Results are lmeans across three biological repeats ± se (n=8-39).
