# Supplementary material for: An evolutionarily young defense metabolite influences the root growth of plants via the ancient TOR signaling pathway
Source: eLife journal article supplement (doi:10.7554/elife.29353), 2017-12-11
Supplement: supp [file elife-29353-supp-v1.zip]

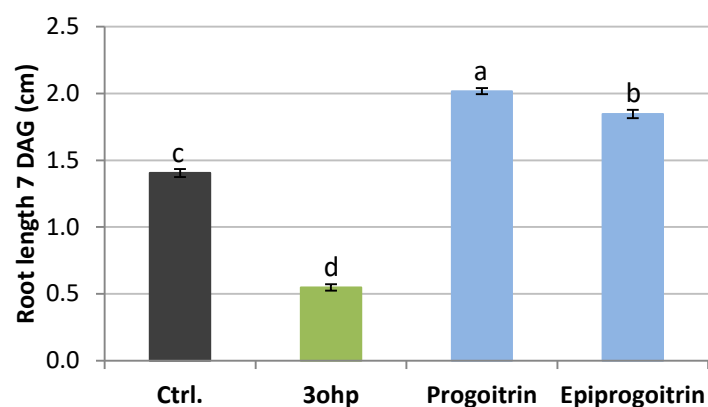

**Figure 2 –figure supplement 1.**

Root lengths of 7 DAG Col-0 WT grown on MS media supplemented with 50μM of the indicated GSL.  
Progoitrin = R enantiomer of 2-hydroxybut3-enyl  
GSL and Epiprogoitrin is the S enantiomer. Results  
were obtained in two fully independent  
experiments and tested with ANOVA. LSmeans are  
shown with letters showing treatments with  
statistical differences following a Tukey's post-hoc t-  
test. The samples sizes are 97 seedlings for control,  
152 for 3OHP, 160 for progoitrin and 94 for  
epiprogoitrin. LSmeans and SE are plotted
