# Supplementary material for: An evolutionarily young defense metabolite influences the root growth of plants via the ancient TOR signaling pathway
Source: eLife journal article supplement (doi:10.7554/elife.29353), 2017-12-11
Supplement: supp [file elife-29353-supp-v1.zip]

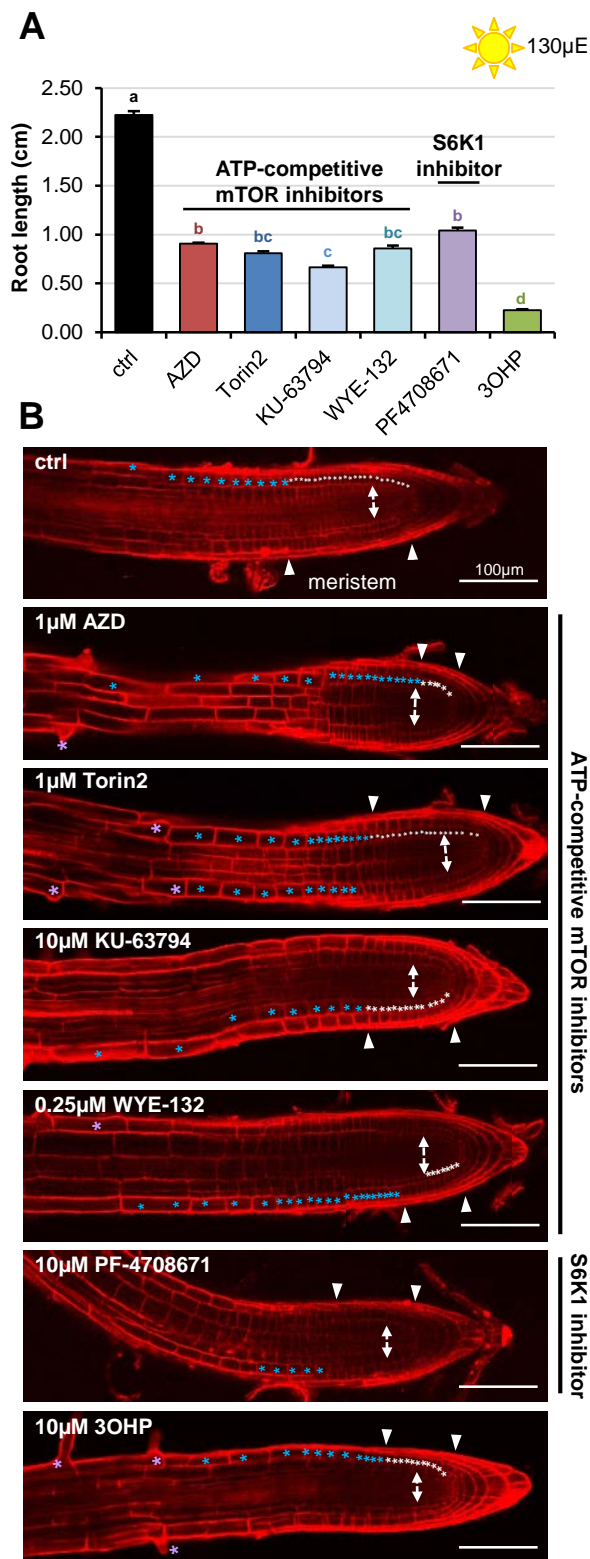

**Figure 7 –figure supplement 1.**

**A.** Root lengths of 7-d-old Col-0 wildtype seedlings grown on MS medium with sucrose  $\pm$  the indicated mTOR or S6K1 inhibitors. Results are averages  $\pm$  SE (n=8-41). **B** Confocal images of 4-d-old propidium iodide stained seedlings. Meristematic cells are marked with white asterisks, elongated cells with blue, and cells belonging to the differentiation zone are marked with purple asterisks. Arrows indicate approximate meristem sizes.
