# Supplementary material for: An evolutionarily young defense metabolite influences the root growth of plants via the ancient TOR signaling pathway
Source: eLife journal article supplement (doi:10.7554/elife.29353), 2017-12-11
Supplement: supp [file elife-29353-supp-v1.zip]

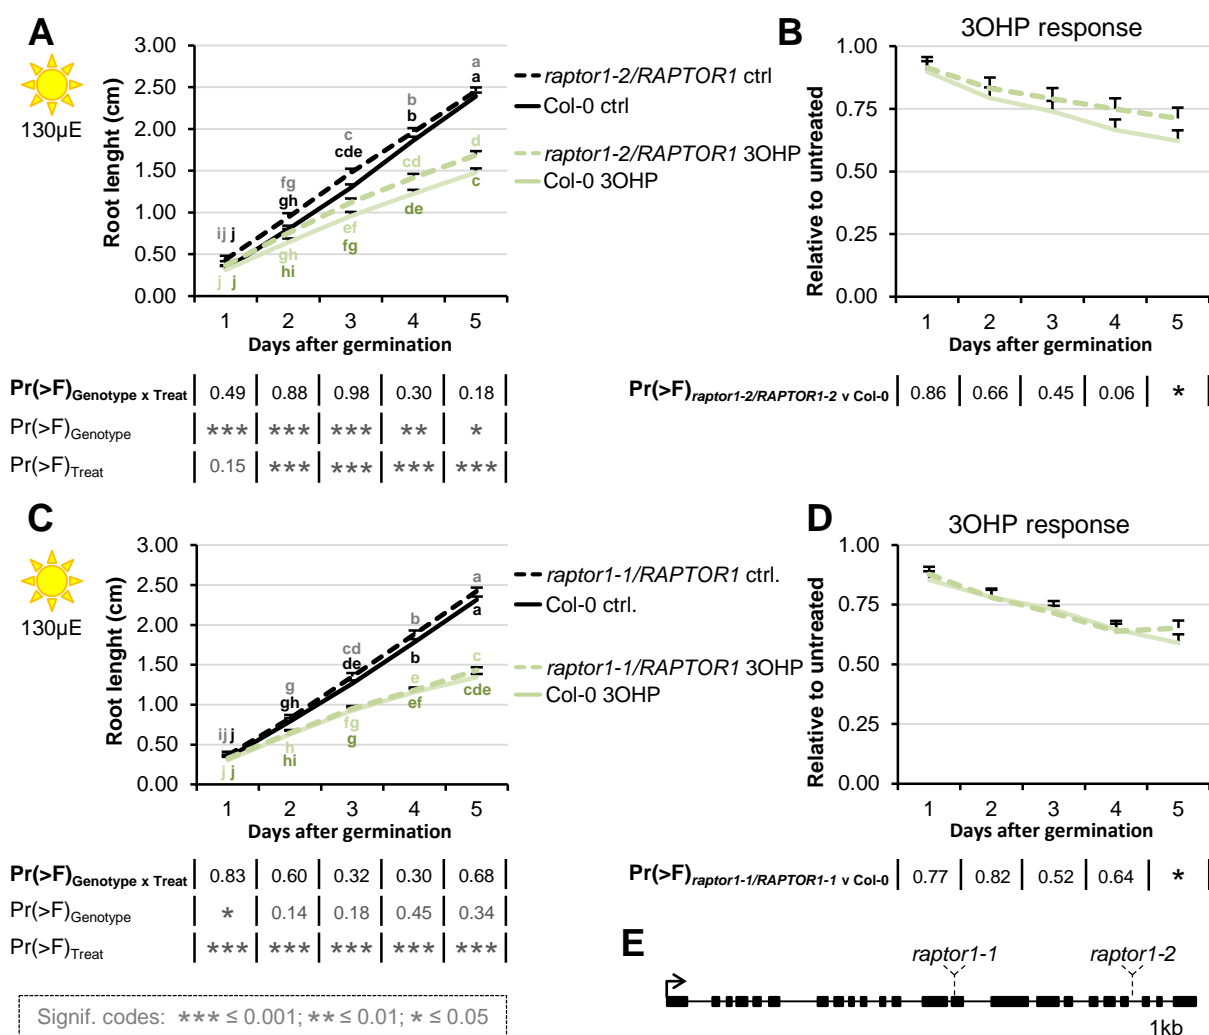

**Figure 5 –figure supplement 2. *RAPTOR1* haplo-insufficiency does not affect 3OHP response.**

**A** Root growth for heterozygous *raptor1-2* and wildtype Col-0 seedlings grown on MS medium supplemented with or without 5μM 3OHP. Multi-factorial ANOVA was used to test the impact of Genotype (Col-0 v *raptor1-2*), Treatment (Control v 3OHP) and their interaction on root length. All experiments were combined in the model and experiment treated as a random effect. The ANOVA results from each day are presented in the table.

**B** Root lengths in response to 3OHP (from A) displayed at each time point as relative to untreated. Results are least squared means ± SE over three independent experimental replicates with each experiment having an average of six replicates per condition (n=16-19). **C** Root growth for heterozygous *raptor1-2* and wildtype Col-0 seedlings grown on MS medium supplemented with or without 5μM 3OHP. Multi-factorial ANOVA was used to test the impact of Genotype (Col-0 v *raptor1-1*), Treatment (Control v 3OHP) and their interaction on root length. All experiments were combined in the model and experiment treated as a random effect. The ANOVA results from each day are presented in the table.

**D** Root lengths in response to 3OHP (from C) displayed at each time point as relative to untreated. Results are least squared means ± SE over three independent experimental replicates with each experiment having an average of seven replicates per condition (n=16-24). **E** Gene structure and T-DNA insertion sites for *RAPTOR1*.
